# Supplementary material
Source: PubMed Central journal article supplement (PMC5643200)
Supplement: NIHMS909912-supplement-Supplementary_Material.pdf [file NIHMS909912-supplement-Supplementary_Material.pdf]

## Supporting Information

# NMR study of RNA structures in the 3'-end of the Hepatitis C Virus genome

Clayton Kranawetter<sup>1</sup>, Samantha Brady<sup>1</sup>, Lizhen Sun<sup>2</sup>, Mark Schroeder<sup>1</sup>, Shi-Jie  
Chen<sup>2,\*</sup> and Xiao Heng<sup>1,\*</sup>

<sup>1</sup> Department of Biochemistry, University of Missouri, Columbia, 65211

<sup>2</sup> Department of Physics, Department of Biochemistry, and Informatics Institute,  
University of Missouri, Columbia, 65211

\* Correspondence: [hengx@missouri.edu](mailto:hengx@missouri.edu); [ChenShi@missouri.edu](mailto:ChenShi@missouri.edu)

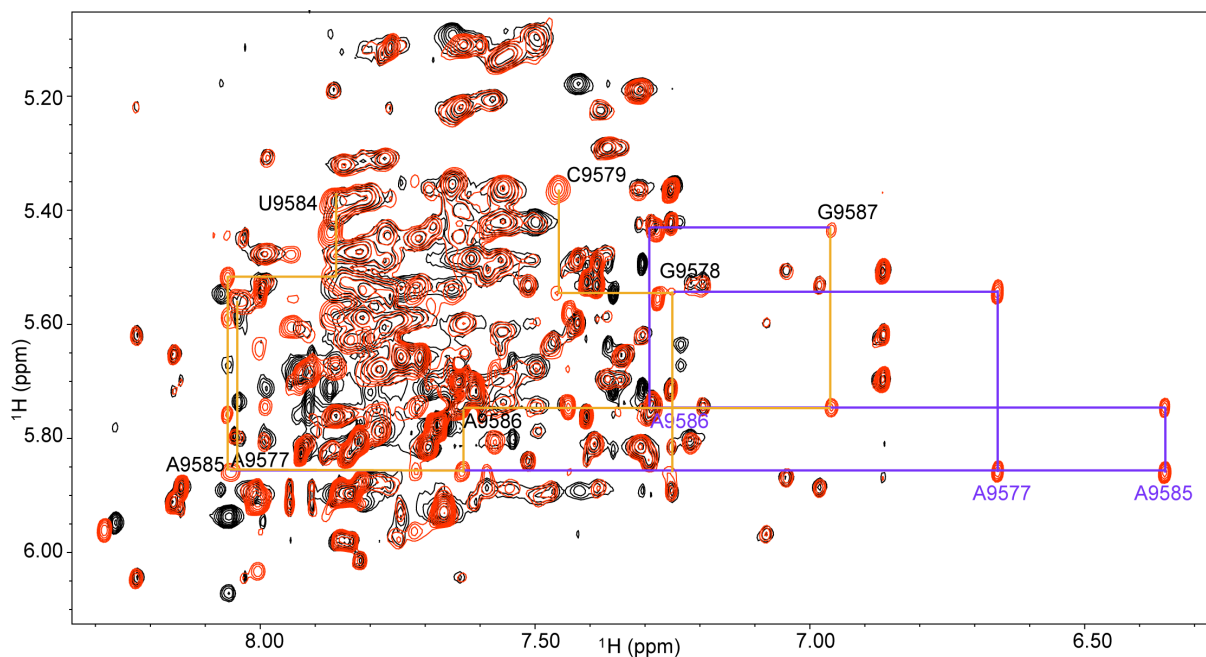

Figure S1: The 3'X<sup>2SL-IrAID</sup> RNA adopts a similar structure as 3'X. Overlay of the aromatic region of the 2D 1H-1H NOESY spectra collected for 3'X (black) and 3'X<sup>2SL-IrAID</sup> (red) is shown. The modest spectral changes were caused by the mutations in 3'X<sup>2SL-IrAID</sup>, and the assignment of the mutant sequences in the upper stem of SL2/3 are marked. Adenosine C2-H proton NOE connectivities are marked in purple.

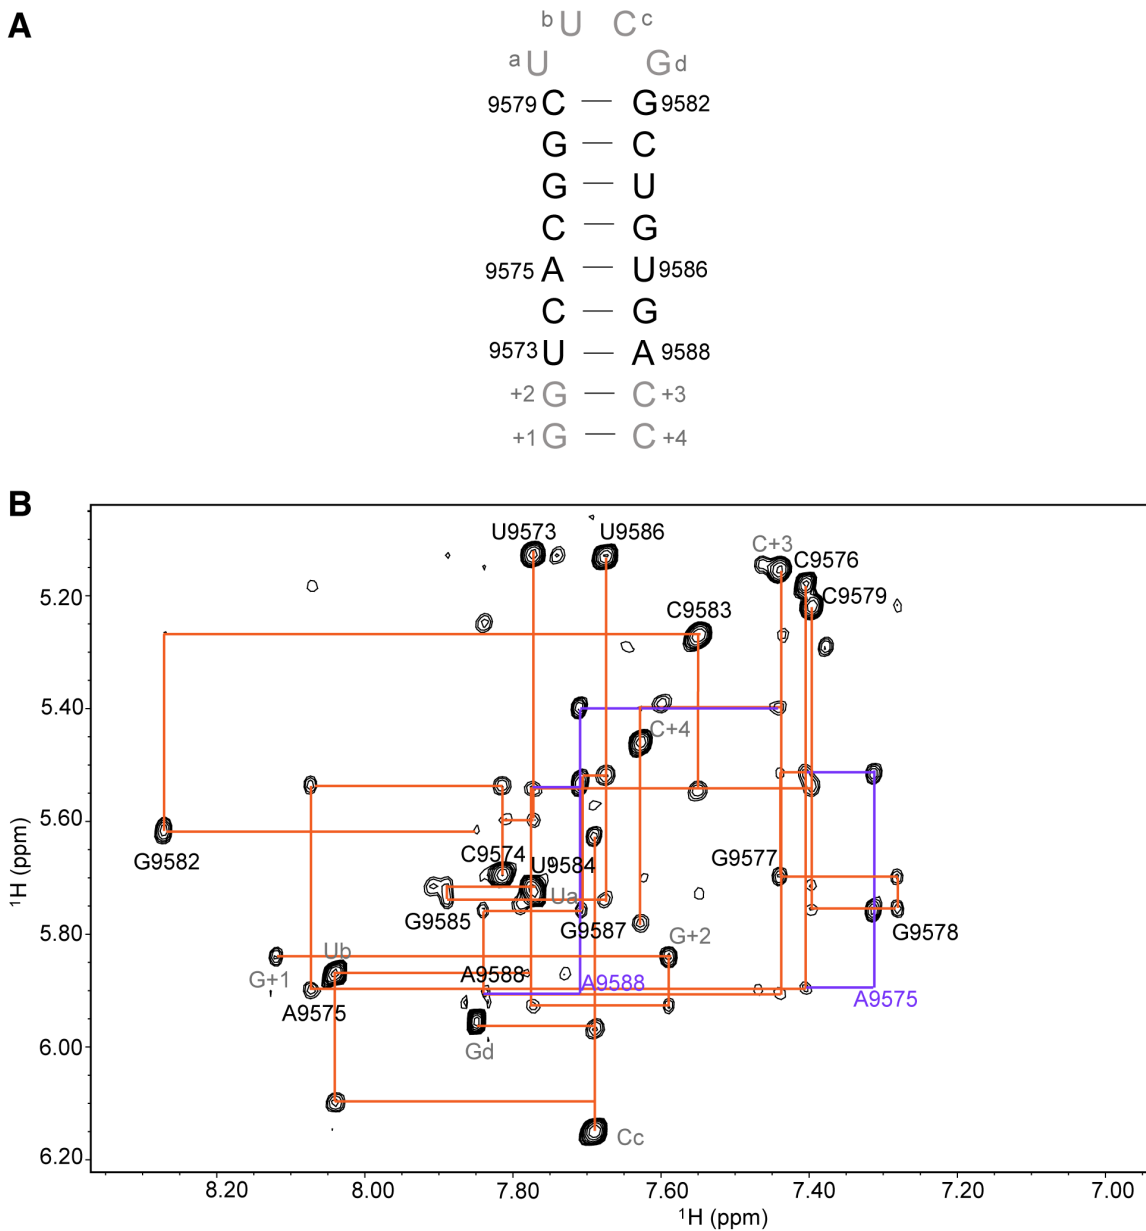

Figure S2: (A) Secondary structure of the SL2/3 control oligonucleotides. (B) Portion of the 2D  $^1\text{H}$ - $^1\text{H}$  NOESY spectrum collected for the SL2/3 control RNA in  $^2\text{H}_2\text{O}$ . Inter- and intra- residue ribose-to-aromatic proton NOE connectivities are labeled. Adenosine C2-H proton NOE connectivities are marked in purple.

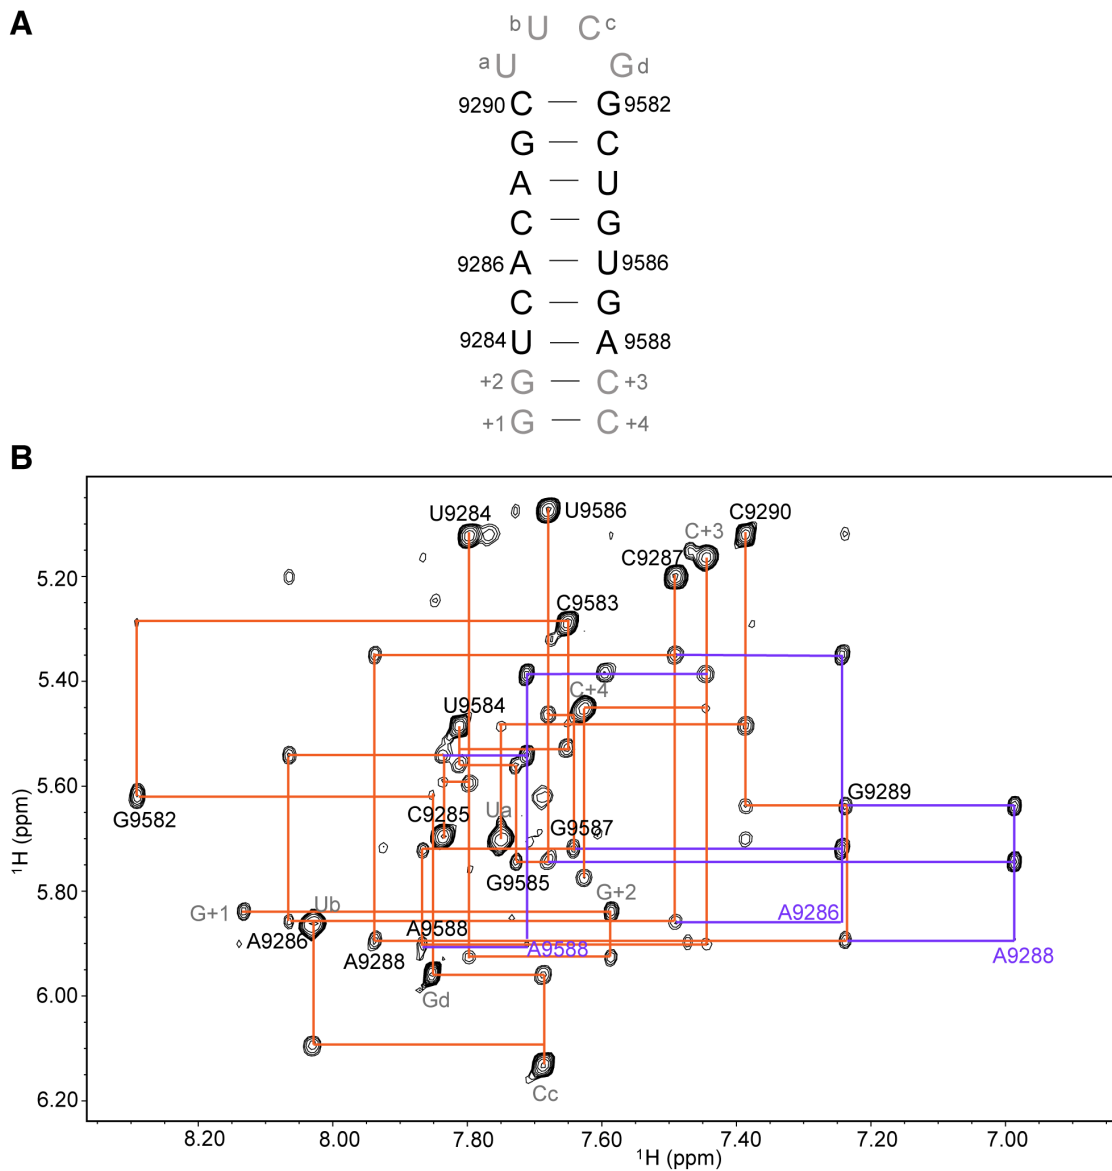

Figure S3: (A) Secondary structure of the kissing-interaction control oligonucleotides. (B) Portion of the 2D  $^1\text{H}$ - $^1\text{H}$  NOESY spectrum collected for the Kissing-loop control RNA in  $^2\text{H}_2\text{O}$ . Inter- and intra- residue ribose-to-aromatic proton NOE connectivities are labeled. Adenosine C2-H proton NOE connectivities are marked in purple.

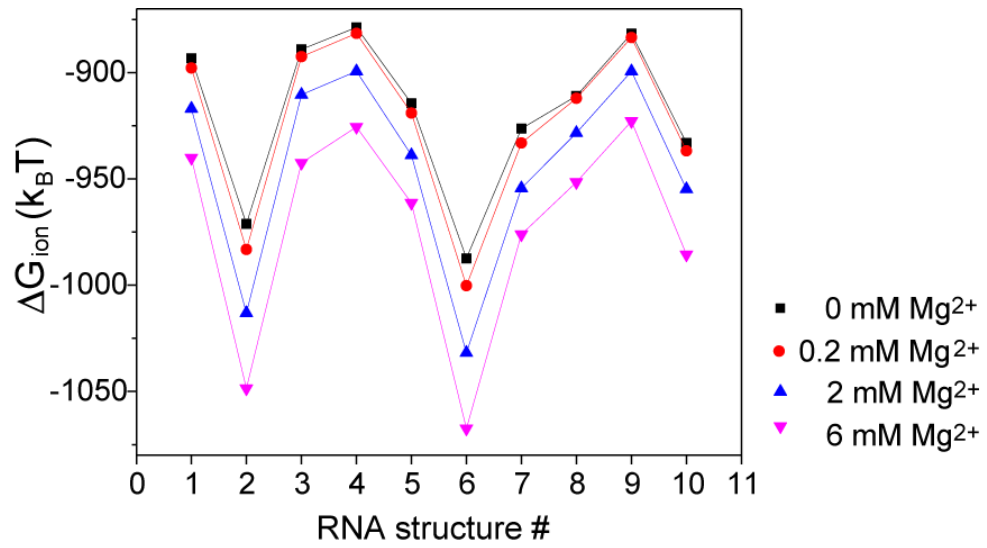

Figure. S4: The ion-induced free energy for each predicted 3D structure of the 3'X 2SL conformation. The bulk concentrations [Mg<sup>2+</sup>] correspond to 0 mM (black), 0.2 mM (red), 2 mM (blue), and 6 mM (pink).

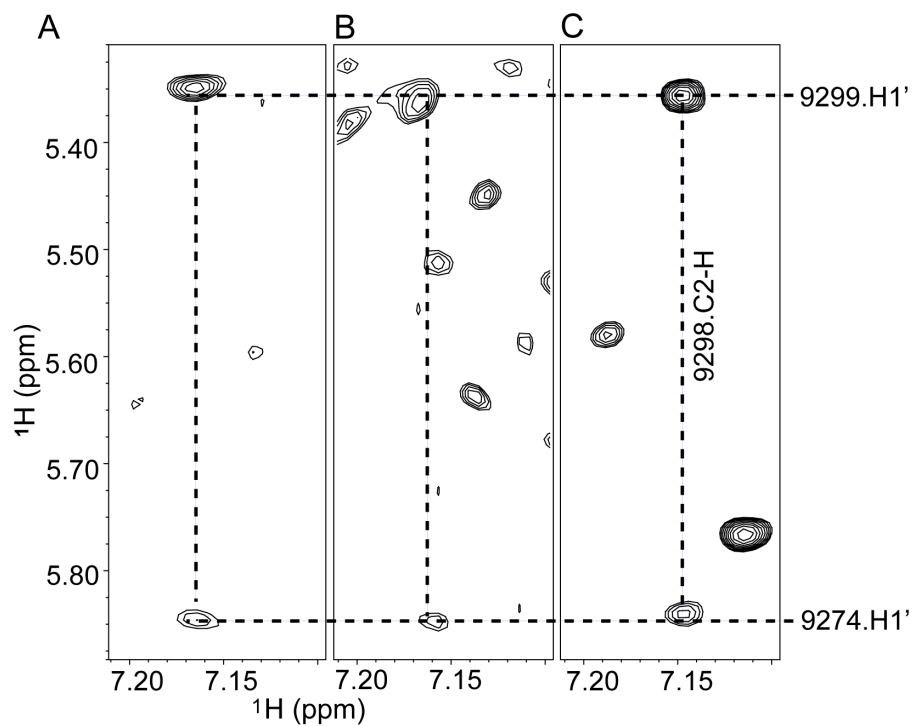

Figure. S5: 5BSL3.2 bulge residues are not affected upon formation of the kissing-loop interaction. The C2-H of A<sub>9298</sub> gave characteristic NOEs to U<sub>9299</sub>-H1' and G<sub>9274</sub>-H1' in the 2D NOESY spectra of 3'END in both PI buffer (A) and PI buffer containing 6 mM MgCl<sub>2</sub> (B). The assignments were made by referencing with the assigned NOESY spectrum of 5BSL3.2 collected in PI buffer (C).
